# Supplementary material for: Enhancing photocatalytic tetracycline degradation through the fabrication of high surface area CeO 2 from a cerium–organic framework
Source: Royal Society of Chemistry journal article supplement (doi:10.1039/d4ra02640c), 2024-01-01
Supplement: d4ra02640c1.pdf [file d4ra02640c1.pdf]

## Support information

### Enhancing photocatalytic tetracycline degradation through the fabrication of high surface area CeO<sub>2</sub> from a cerium-organic framework.

Ayla Roberta Borges Serra<sup>1</sup>, Gabriel Castro de Sousa<sup>2</sup>, Viviane de Carvalho Gomes<sup>2</sup>, Idio Alves de Sousa Filho<sup>3</sup>, Cesar Koppe Grisolia<sup>4</sup>, Baiwen Zhao<sup>5</sup>, Richard I. Walton<sup>5</sup>, Osvaldo Antonio Serra<sup>2\*</sup>

1. *Department of Chemical Engineering, Federal University of São Carlos-UFSCar, São Carlos, SP, Brazil*
2. *LTR, Departamento de Química, FFCLRP, Universidade of São Paulo-USP, Ribeirão Preto, SP, Brazil*
3. *Institute of Chemistry, Rural Federal University of Rio de Janeiro-UFRRJ, Seropédica, RJ, Brazil*
4. *Department of Genetics and Morphology, Institute of Biological Sciences, University Brasilia -UnB, Brasilia, DF, Brazil*
5. *Department of Chemistry, University of Warwick, Coventry CV4 7AL, U.K.*

\* corresponding author's email address: osaserra@usp.br

## Adsorption experiments

The temperature used for the TC adsorption experiment was 25 °C. TC adsorption studies were carried out in a concentration range from 20 to 50 mg L<sup>-1</sup>. Then, 12.5 mg of CeO<sub>2</sub> was added to 25 mL of TC solutions while being constantly stirred. Following that, 2 mL aliquots were collected every 20 minutes, centrifuged at 14,500 rpm for 10 minutes, and the supernatant was analyzed using UV-Vis. (**Fig S3**). Eq. 1 was used to determine the concentration of adsorbed TC:

$$Q_t = \frac{V(C_o - C_f)}{M} \quad (1)$$

where C<sub>0</sub> represents the initial TC concentration (mg L<sup>-1</sup>), C<sub>f</sub> represents the final TC concentration at time t (mg L<sup>-1</sup>), Q<sub>t</sub> represents the adsorptive capacity, V represents the TC solution volume (L), and M denotes the adsorbent mass (g).

Pseudo-first order and pseudo-second order equations were used to examine the kinetics, Eqs. 2 and 3, respectively (El-Latif et al., 2013; Ho and McKay, 1999).

$$\log(Q_e - Q_t) = \log q_e - \frac{k^t}{2.303} \quad (2)$$

where k is the adsorption rate constant (min<sup>-1</sup>) and Q<sub>e</sub> and Q<sub>t</sub> are the amounts of adsorbed TC (mg g<sup>-1</sup>) at equilibrium and at specific times t (min). The slope of the line log (Q<sub>e</sub>-Q<sub>t</sub>) vs t can be used to determine the constant k.

$$\frac{t}{Q_t} = \frac{1}{kQ_e^2} + \frac{1}{Q_e} t \quad (3)$$

where k<sub>2</sub> is the pseudo-second-order constant (g mg<sup>-1</sup> min<sup>-1</sup>) and Q<sub>e</sub> and Q<sub>t</sub> are the amounts of adsorbed TC (mg g<sup>-1</sup>) at equilibrium and at specified times t (min), respectively.

Furthermore, the effect of temperature was evaluated at different temperatures – 303, 313, 323, 333, and 343 K.

### **Photocatalytic experiment**

The photocatalytic activity of the CeO<sub>2</sub> particles was assessed by TC photodegradation under simulative sunlight—a 300W Xenon lamp ( $\lambda \sim 280\text{--}420\text{ nm}$ ) was applied after the TC adsorption process. The same range of TC concentration employed in the TC adsorption experiments was used in the photocatalytic degradation experiments. First, the solution containing the CeO<sub>2</sub> particles and TCs was agitated at 1000 rpm for 60 minutes in a dark environment to ensure that no further adsorption-desorption processes occurred. After that the system was located under visible light irradiation conditions for 2 h. Finally, the TC concentrations during adsorption and the photocatalytic degradation process were analyzed as described in section 2.5.

The Ce-MOF was tested for adsorption and photocatalytic testing using the same methodology as that employed for CeO<sub>2</sub> materials.

### **Toxicity evaluation**

According to OECD procedure No. 236, the Fish Embryo Toxicity (FET) test (*Danio rerio*) was used to evaluate the toxicity of the TC solutions that were the subject of this study (OECD, 2013). The test was performed in 24-well microplates, in three replicates. Twenty wells (i.e., TC solution before and after light exposure in the presence of a photocatalyst) were filled with 2 mL of the test solution at 30 mg L<sup>-1</sup>, and four wells were filled with water (internal plate control). Immediately after the collection of the fertilized eggs, the tests began, in each well an egg was placed, which was kept in a climatized chamber (SL-24 Solab Científica, Brazil) at 25 °C for 144 h. For 168 hours, test solutions were applied to the zebrafish embryos, and any deformities were observed under a stereomicroscope daily. The University of Brasilia's ethical committee gave its approval to this study (reference number 100226/2014).

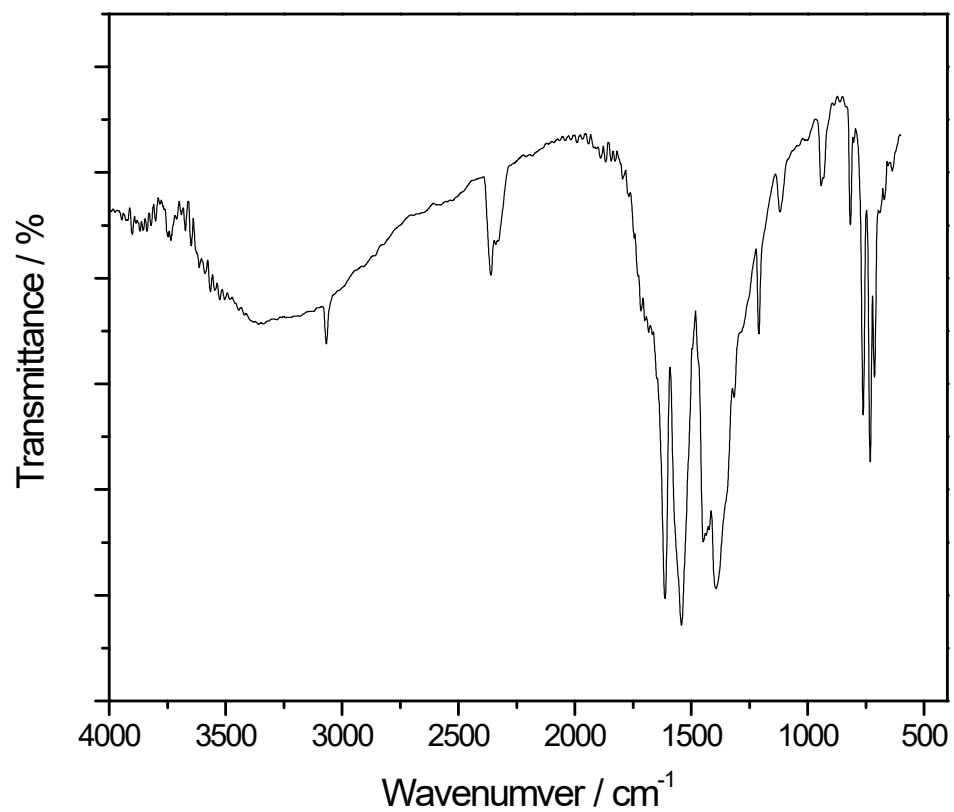

**Figure S1.** Vibrational infrared spectra (FTIR) for cerium metal-organic framework Ce-BTC.

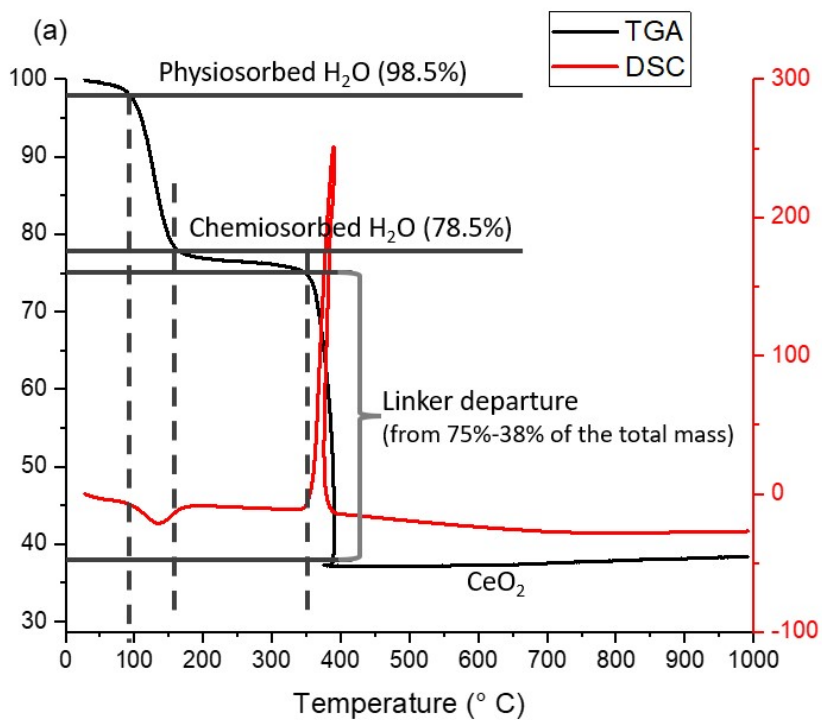

**Figure S2:** TGA/DSC analysis of Ce-MOF

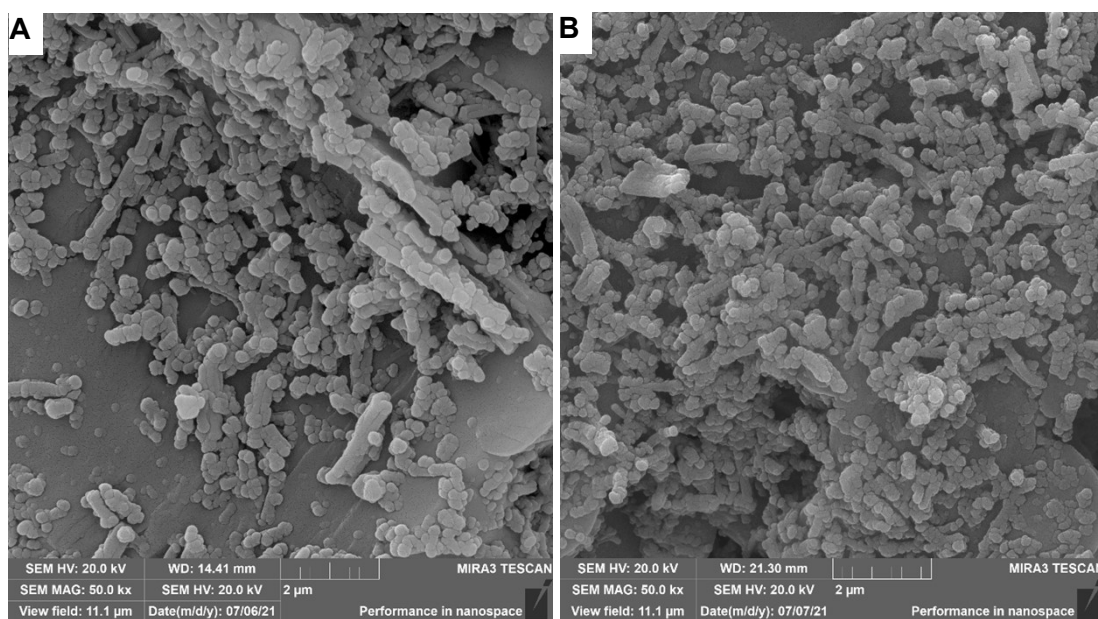

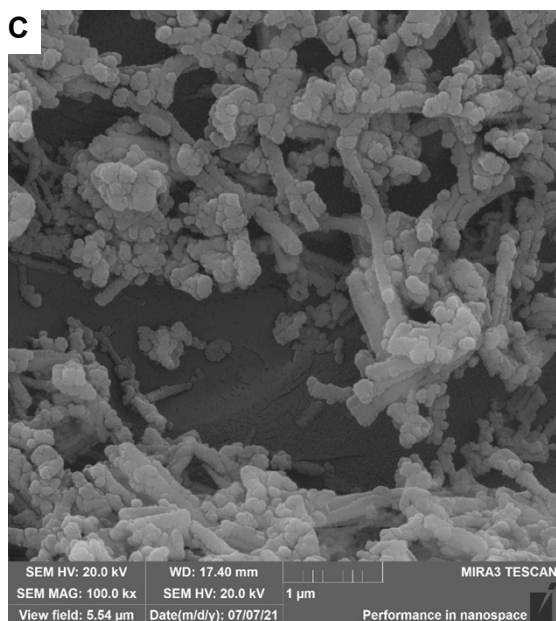

**Fig S3:** (A) Morphology of the oxides of oxides obtained by the Ce-MOF calcination at (a) 500, (b) 700 and (C) 900 °C.

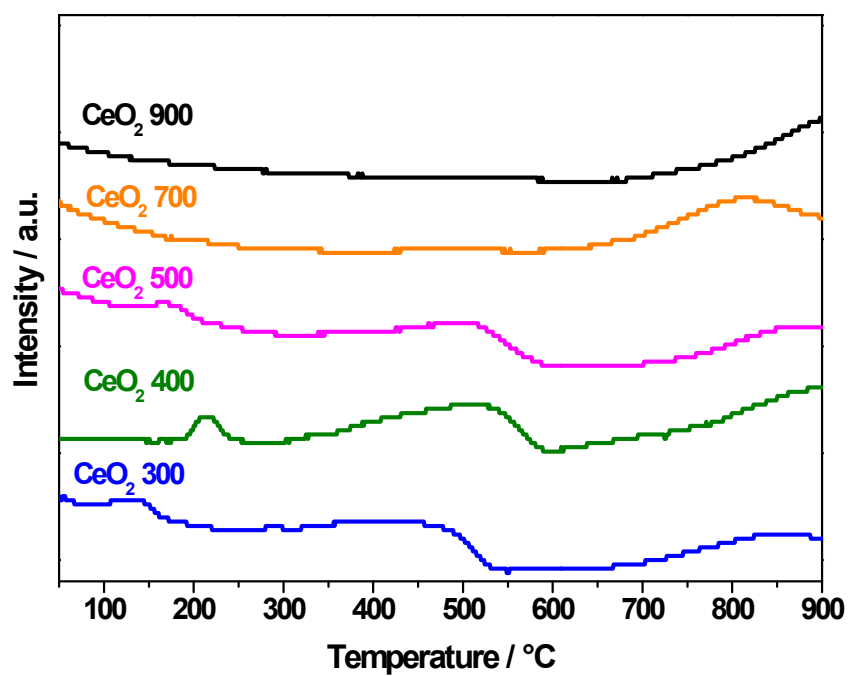

**Fig S4:** H<sub>2</sub> MS Signal for all the CeO<sub>2</sub> samples.

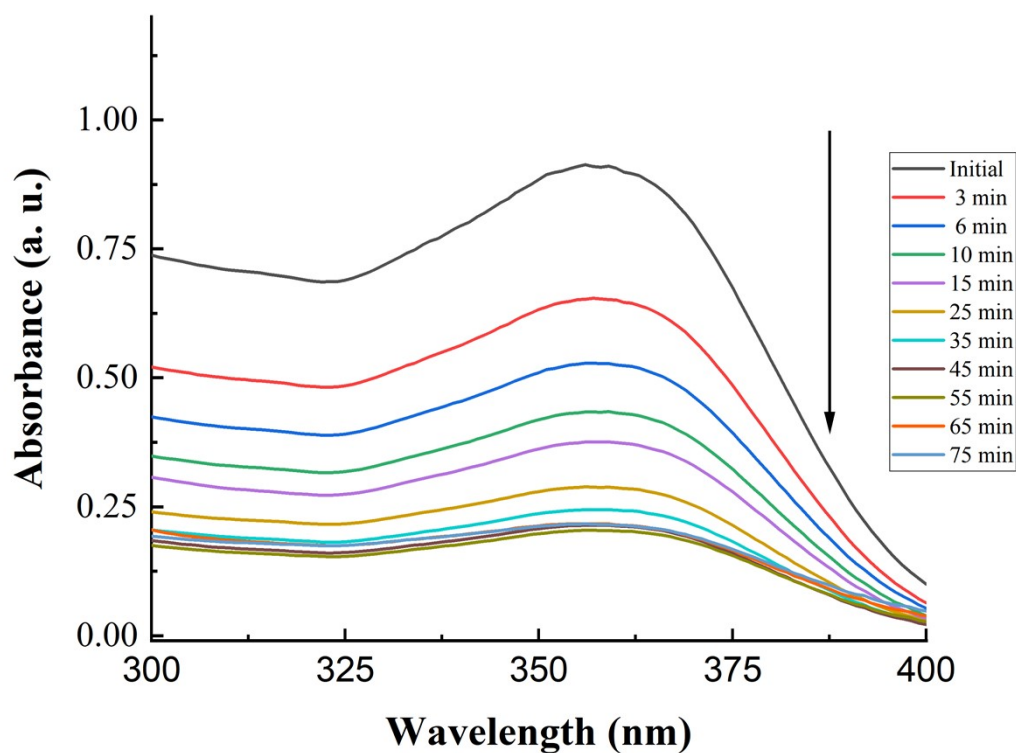

**Fig S5:** UV-Vis spectrum for Tetracycline (30 mg L<sup>-1</sup>) as a function of adsorption time on CeO<sub>2</sub> (300 °C), at room temperature.

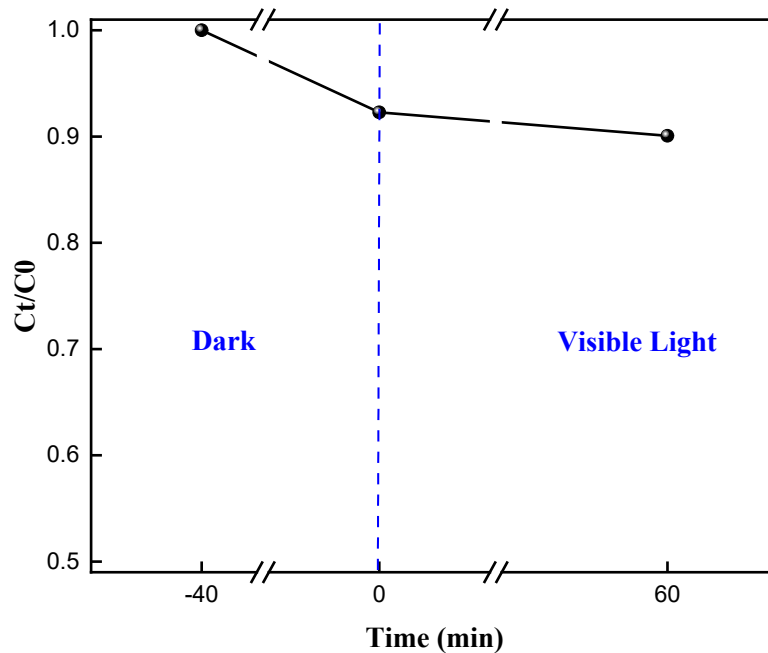

**Fig S6:** TC degradation performance of the photocatalyst Ce-MOF under simulative sunlight irradiation for 30 mg L<sup>-1</sup> TCs.

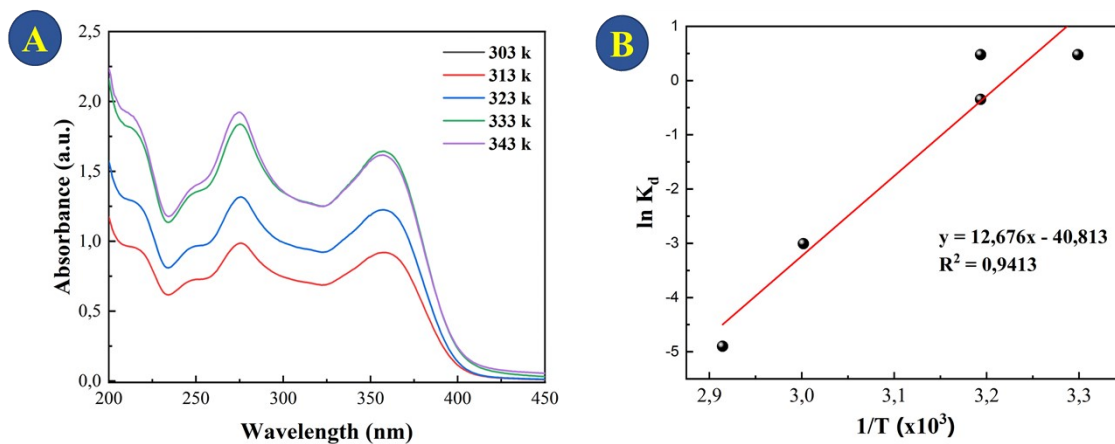

**Fig S7:** (A) TC adsorption ( $50 \text{ mg L}^{-1}$ ) at different temperatures; (B) Plot of  $\ln K_d$  vs  $1/T$  used to calculate the thermodynamic parameters of adsorption.

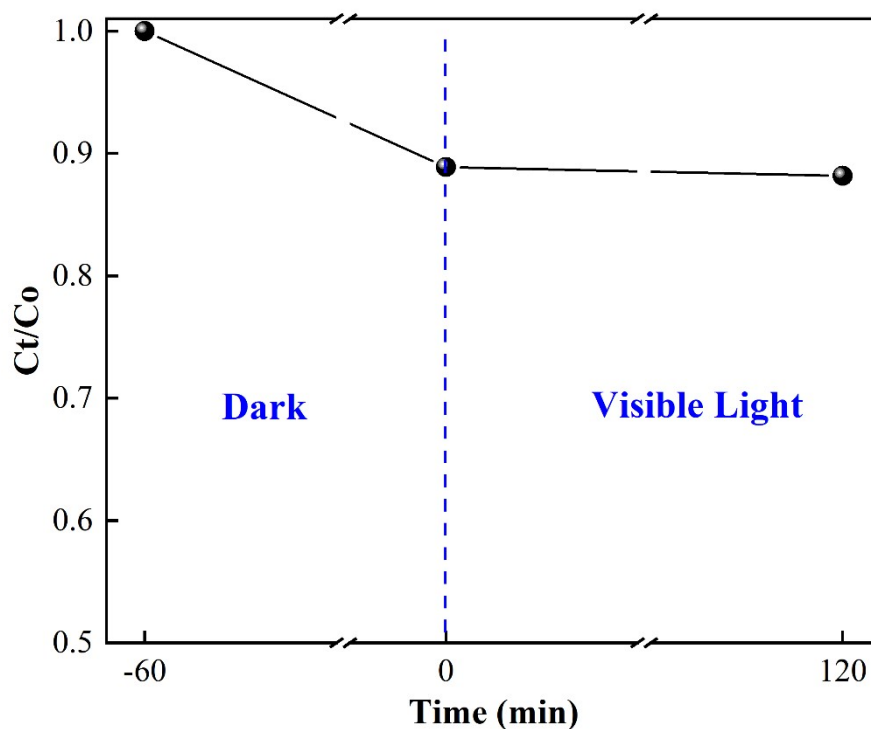

**Fig S8:** TC degradation performance of the photocatalyst (the commercial  $\text{CeO}_2$ ) under simulative sunlight irradiation for  $30 \text{ mg L}^{-1}$  TCs.



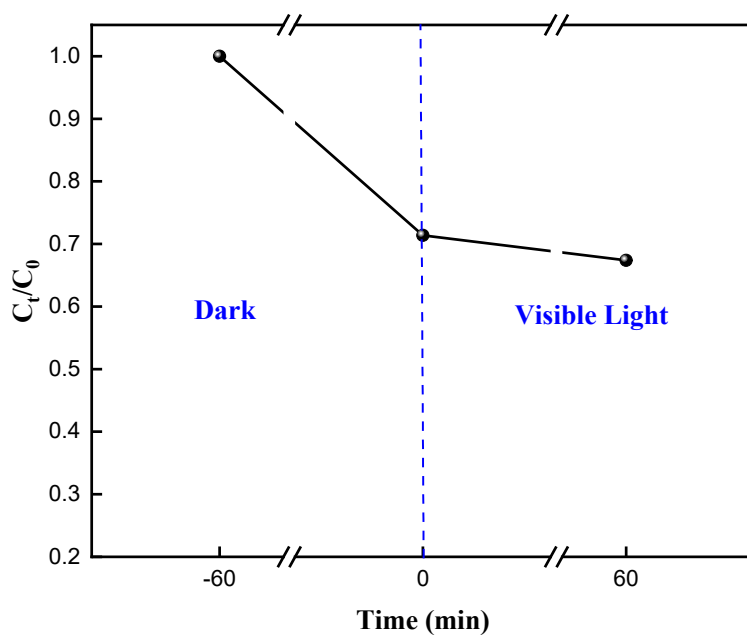

**Fig S9:** TC degradation performance in the reuse test for  $\text{CeO}_2\text{-300}$  under simulative sunlight irradiation for  $30 \text{ mg L}^{-1}$  TCs. The composite  $\text{CeO}_2\text{@TC}$  was maintained in water by irradiation for 60 min before performing the reuse test.

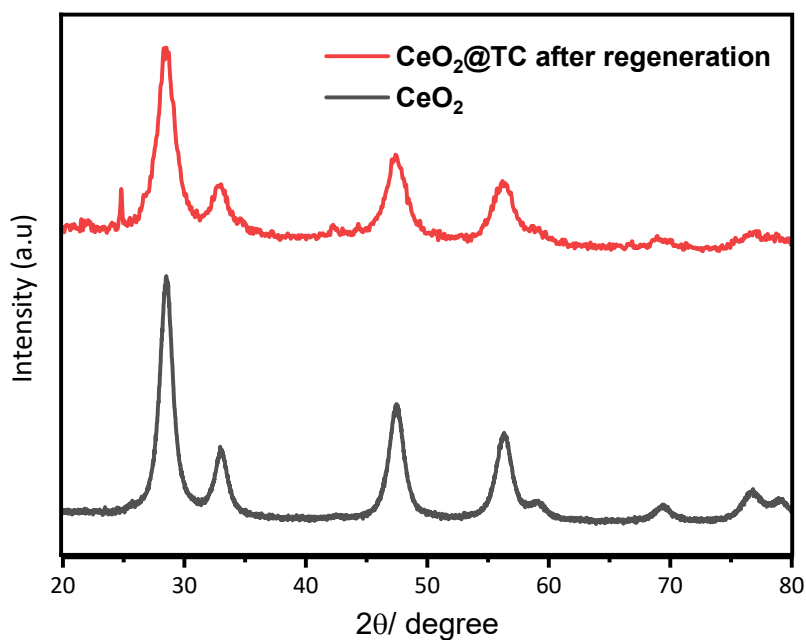

**Fig S10:** XRD pattern of the composite  $\text{CeO}_2\text{@TC}$  after regeneration for the reuse test.

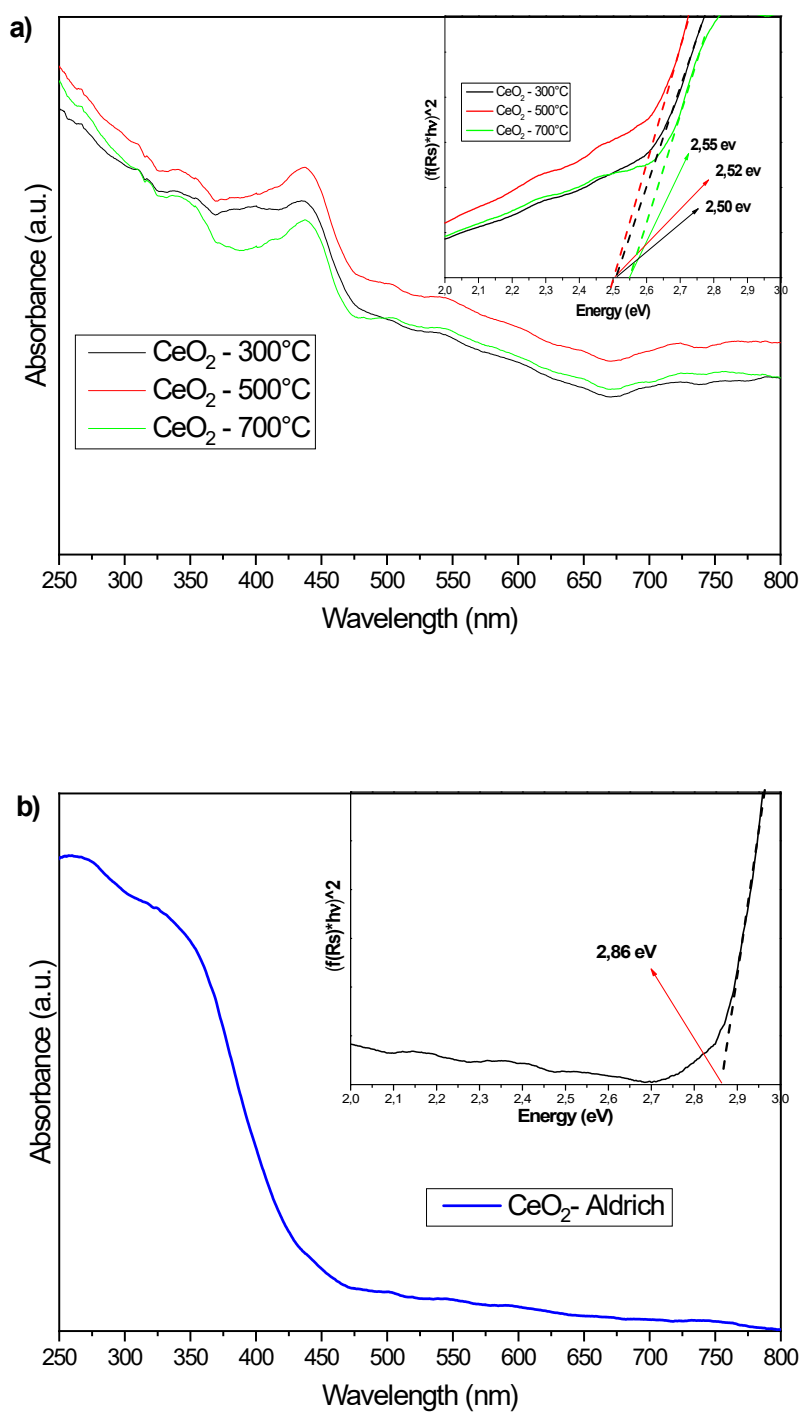

**Fig S11:** Transmittance spectrum and band-gap calculations for the (a) CeO<sub>2</sub>-300, CeO<sub>2</sub>-500, CeO<sub>2</sub>-700 and (b) CeO<sub>2</sub> commercial.

**Table S1: Peak positions and Miller indices for the powder XRD pattern of La(BTC)·6H<sub>2</sub>O (CCDC 290771).**

| <b>2<math>\theta</math>/°</b> | <b>hkl</b> |
|-------------------------------|------------|
| 9.799                         | 020        |
| 10.085                        | 110        |
| 13.148                        | -111       |
| 16.985                        | 021        |
| 17.182                        | 130        |
| 17.676                        | 200        |
| 18.967                        | -221       |
| 19.159                        | -131       |
| 19.67                         | 040        |
| 20.248                        | 220        |
| 20.405                        | 111        |
| 23.665                        | -3-11      |
| 24.131                        | 041        |
| 24.531                        | -202       |
| 24.76                         | 131        |
| 25.182                        | -112       |
| 25.586                        | -2-41      |
| 26.231                        | 150        |
| 26.473                        | -222       |
| 26.564                        | 240        |
| 27.11                         | 310        |
| 27.535                        | -3-31      |
| 27.594                        | -151       |
| 27.887                        | 002        |
| 27.919                        | -312       |
| 28.863                        | -132       |
| 29.234                        | 221        |
| 29.625                        | 022        |
| 29.692                        | 060        |
| 30.576                        | 330        |
| 31.302                        | -332       |
| 31.638                        | -242       |
| 31.819                        | 151        |
| 32.735                        | -402       |
| 32.795                        | -4-21      |
| 32.895                        | 061        |
| 33.707                        | 12         |
| 34.004                        | -2-61      |
| 34.018                        | 241        |
| 34.068                        | -3-51      |
| 34.25                         | -4-22      |
| 34.359                        | 042        |
| 34.766                        | 260        |

**Table S2: Comparison of adsorption and photocatalysis process for the oxides (CeO<sub>2</sub>-300, CeO<sub>2</sub>-500, CeO<sub>2</sub>-700), for CeO<sub>2</sub> commercial, under TC solution of 30 mg.L<sup>-1</sup>.**

| <b>Samples</b>               | <b>Adsorption (%)</b> | <b>Photocatalysis (%)</b> | <b>Total Removal (%)</b> |
|------------------------------|-----------------------|---------------------------|--------------------------|
| CeO <sub>2</sub> -300        | 60                    | 38                        | 98                       |
| CeO <sub>2</sub> -500        | 40                    | 25                        | 65                       |
| CeO <sub>2</sub> -700        | 15                    | 20                        | 35                       |
| CeO <sub>2</sub> -commercial | 10                    | 0                         | 10                       |

**Table S3: Potential zeta values for the oxides (CeO<sub>2</sub>-300, CeO<sub>2</sub>-500, CeO<sub>2</sub>-700), for CeO<sub>2</sub> commercial, Ce-MOF and TC solution of 30 mg.L<sup>-1</sup>.**

| <b>Samples</b>               | <b>Zeta Potential (mV)</b> |
|------------------------------|----------------------------|
| CeO <sub>2</sub> -300        | +33.0                      |
| CeO <sub>2</sub> -500        | +26.7                      |
| CeO <sub>2</sub> -700        | -6.81                      |
| CeO <sub>2</sub> -commercial | +5.40                      |
| Ce-MOF                       | -13.00                     |
| TC                           | -10.0                      |
